# Supplementary material
Source: PubMed Central journal article supplement (PMC3941034)
Supplement: NIHMS564089-supplement-Materials_List.pdf [file NIHMS564089-supplement-Materials_List.pdf]

Materials List for:

# Giant Liposome Preparation for Imaging and Patch-Clamp Electrophysiology

Marcus D. Collins<sup>1</sup>, Sharona E. Gordon<sup>1</sup>

<sup>1</sup>Department of Physiology and Biophysics, University of Washington

Correspondence to: Sharona E. Gordon at [seg@uw.edu](mailto:seg@uw.edu)

URL: <http://www.jove.com/video/50227>

DOI: [doi:10.3791/50227](https://doi.org/10.3791/50227)

## Materials

| Name                    | Company                                                                                                        | Catalog Number               | Comments                                                                                                                                                                                            |
|-------------------------|----------------------------------------------------------------------------------------------------------------|------------------------------|-----------------------------------------------------------------------------------------------------------------------------------------------------------------------------------------------------|
| Digital Multimeter      | Agilent Technologies,<br><a href="http://www.agilent.com">www.agilent.com</a>                                  | U1232A or similar            | Any multimeter will do, but avoid old style analog ohmmeters which apply much more current to the resistance under test.                                                                            |
|                         | Fluke                                                                                                          | 117 or 177                   | Any multimeter will do, but avoid old style analog ohmmeters which apply much more current to the resistance under test.                                                                            |
| Function Generator      | Agilent Technologies,<br><a href="http://www.agilent.com">www.agilent.com</a>                                  | 33210A or similar            | Most function generators work for simple protocols. This programmable model is useful for advanced electroformation protocols. Make sure the generator can drive 10 V peak-to-peak into a 50 Ω load |
| ITO coated glass slides | Delta Technologies, Loveland, CO<br><a href="http://www.delta-technologies.com">www.delta-technologies.com</a> | CB-90IN-S107 or similar      | Break these in half to make two slides, 25 mm x 37 mm                                                                                                                                               |
| Temperature controller  | Omega Engineering Stamford, CT<br><a href="http://www.omega.com">www.omega.com</a>                             | CNI3233 or similar           |                                                                                                                                                                                                     |
| Hygrometer              | Extech, Nashua, NH,<br><a href="http://www.extech.com">www.extech.com</a>                                      | 445815                       |                                                                                                                                                                                                     |
| Silicone rubber sheet   | McMaster-Carr Elmhurst, IL<br><a href="http://www.mcmaster.com">www.mcmaster.com</a>                           | <a href="#">87315K64</a>     | Use USP Grade VI silicone for its high purity                                                                                                                                                       |
| EMI gasket              | Laird Technologies<br><a href="http://www.lairdtech.com">www.lairdtech.com</a>                                 | 4202-PA-51H-01800 or similar | Distributed by Mouser<br><a href="http://www.mouser.com">www.mouser.com</a>                                                                                                                         |
| TxR-DHPE                | Life Technologies, Carlsbad, CA<br><a href="http://www.lifetechnologies.com">www.lifetechnologies.com</a>      | T1395MP                      | Other fluorescently labeled lipids are available, but TxR-DHPE is one of the brightest and most photostable.                                                                                        |
| POPC                    | Avanti Polar Lipids, Alabaster, AL<br><a href="http://www.avantilipids.com">www.avantilipids.com</a>           | 850457P or 850457C           | Lipids can be ordered as powders (P) or in chloroform (C)                                                                                                                                           |
| POPS                    | Avanti Polar Lipids                                                                                            | 840034P/C                    |                                                                                                                                                                                                     |
| Cholesterol             | Sigma-Aldrich                                                                                                  | C8667                        |                                                                                                                                                                                                     |
